# Supplementary material for: An expression atlas of variant ionotropic glutamate receptors identifies a molecular basis of carbonation sensing
Source: PubMed Central journal article supplement (PMC6185939; doi:10.1038/s41467-018-06453-1), 2018-10-12
Supplement: 41467_2018_6453_MOESM1_ESM.pdf [file 41467_2018_6453_MOESM1_ESM.pdf]

## **Supplementary Information**

### **An expression atlas of variant ionotropic glutamate receptors identifies a molecular basis of carbonation sensing**

Juan Antonio Sánchez-Alcañiz, Ana Florencia Silbering, Vincent Croset, Giovanna Zappia, Anantha Krishna Sivasubramaniam, Liliane Abuin, Saumya Yashmohini Sahai, Daniel Münch, Kathrin Steck, Thomas O. Auer, Steeve Cruchet, G. Larisa Neagu-Maier, Simon G. Sprecher, Carlos Ribeiro, Nilay Yapici and Richard Benton

## Supplementary Table 1. Oligonucleotide sequences and construction of *Ir-Gal4* lines.

| Gene <sup>1</sup>             | Forward primer (5'-3') <sup>2</sup> | Reverse primer (5'-3') <sup>2</sup> | Length (bp) | Template       | Vector     | Integration site | Transgenic line code | Source <sup>3</sup> |
|-------------------------------|-------------------------------------|-------------------------------------|-------------|----------------|------------|------------------|----------------------|---------------------|
| <i>Ir7a</i>                   | AGATCTGGTGAAGAATAGAGTGTGGC          | GAATCTTTGAAACGAAACTGTTGGC           | 2318        | OR genomic DNA | pGAL4 attB | attP2            | BT58.1               | (a)                 |
| <i>Ir7b</i>                   | AGATCTGGGATGAGAAGACATCGAT           | GAATCCGGCTAAAGAGTTGCCAAAGG          | 578         | OR genomic DNA | pGAL4 attB | attP2            | BT47.1               | (b)                 |
| <i>Ir7c</i>                   | CTCGAGGCCGGTTAGTGGTCCAAATA          | AGATCTATCGTGTTCATCGGTGGCT           | 1595        | OR genomic DNA | pGAL4 attB | attP2            | BT110.1              |                     |
| <i>Ir7d</i>                   | AGATCTAACTTGTGTCAATGCGATCC          | AGATCTGGCGAATGTGAAACATTTGG          | 1010        | OR genomic DNA | pGAL4 attB | attP2            | BT79.1               | (b)                 |
| <i>Ir7e</i>                   | AGATCTTACTTCGGCAGGGAACAG            | GAATCTTGTCCCGGACAAATCGT             | 600         | OR genomic DNA | pGAL4 attB | attP2            | BT59.1               | (b)                 |
| <i>Ir7f</i>                   | AGATCTGTCCGTCTATCGAAATCCGG          | AGATCTATCGATCCTCGAATCTCCA           | 766         | OR genomic DNA | pGAL4 attB | attP2            | BT98.1               |                     |
| <i>Ir7g</i>                   | AGATCTATCGATCCTCGAATCTCCA           | AGATCTGTCCGTCTATCGAATCCGG           | 766         | OR genomic DNA | pGAL4 attB | attP2            | BT99.1               | (b)                 |
| <i>Ir10a</i>                  | CGGGCCGACACTATAGTCCACTACC           | CGGGCCGCTCGTATGGGATTTGTAGCAC        | 2429        | OR genomic DNA | pGAL4 attB | attP2            | BT96.1               |                     |
| <i>Ir11a</i>                  | AGATCTATGTATGTCATGCCACCAGC          | GAATTCGACTGAATGGCCGTTGTGAA          | 2099        | OR genomic DNA | pGAL4 attB | attP2            | BT51.1               | (a)                 |
| <i>Ir20a</i>                  | AGATCTACATTGTCGGCAGCTCCGAG          | AGATCTGTCCCGGCATCGAAGGAAT           | 2488        | OR genomic DNA | pGAL4 attB | attP2            | BT61.1               |                     |
| <i>Ir47a</i>                  | AGATCTGCTGAGTTGGGTGACGAATC          | GAATCTTTTTATGGCCTTTTGAAC            | 2488        | OR genomic DNA | pGAL4 attB | attP2            | BT53.1               |                     |
| <i>Ir47b<math>\Psi</math></i> |                                     |                                     |             |                |            |                  |                      |                     |
| <i>Ir48a<math>\Psi</math></i> |                                     |                                     |             |                |            |                  |                      |                     |
| <i>Ir48b</i>                  | AGATCTCCAGTCCAGTCCAGATTGC           | AGATCTCTGAAAGATATATAGAGCGT          | 2575        | OR genomic DNA | pGAL4 attB | attP2            | BT97.1               |                     |
| <i>Ir51a<math>\Psi</math></i> |                                     |                                     |             |                |            |                  |                      |                     |
| <i>Ir51b</i>                  | AGATCTCAACCAATCAAGCTGGATAC          | AGATCTGGTGGTTGATTCAATTGTGACA        | 2499        | OR genomic DNA | pGAL4 attB | attP2            | BT82.1               |                     |
| <i>Ir52a</i>                  | AGATCTCCGACATTTCTTCGCGTAAC          | AGATCTCACGAAACTGTTGACAAATCC         | 2931        | OR genomic DNA | pGAL4 attB | attP2            | BT100.1              |                     |
| <i>Ir52b</i>                  | AGATCTACTGGAGATATTGGTTGGG           | GAATCTGTTTTCAAAACAAACTGTTT          | 473         | OR genomic DNA | pGAL4 attB | attP2            | BT55.1               | (a)                 |
| <i>Ir52c</i>                  | AGATCTAAACGCTGGATGAAATCCG           | AGATCTGGTGCCTAAGTGACTAATGG          | 644         | OR genomic DNA | pGAL4 attB | attP2            | BT80.1               |                     |
| <i>Ir52d</i>                  | AGATCTTGAGATACTGGAGGAATGTC          | GAATCCGGTGAAGAGTTACTATTGC           | 664         | OR genomic DNA | pGAL4 attB | attP2            | BT56.1               |                     |
| <i>Ir52e<sup>4</sup></i>      |                                     |                                     |             |                |            |                  |                      |                     |
| <i>Ir54a</i>                  | AGATCTGACGCAAGTGCAGCTATTG           | AGATCTGTCCTTCAATATGTTGCC            | 2493        | OR genomic DNA | pGAL4 attB | attP2            | BT101.1              |                     |
| <i>Ir56a<sup>5</sup></i>      | AGATCTATCATCACTGGCTGTCATGC          | GAATCCGGCTGCCTTACCACCTTGAC          | 2400        | OR genomic DNA | pGAL4 attB | attP2            | BT52.1               | (a)                 |
| <i>Ir56b</i>                  | CGGCCGCGATATCCTTCGGTGGAAGTGC        | CGGCCGCGTGAAATATCTGCACCTGA          | 2461        | OR genomic DNA | pGAL4 attB | attP2            | BT62.1               |                     |
| <i>Ir56c</i>                  | AGATCTGCAAGACCTCCACAGATG            | GAATTCGACTTCCCTTAGAAGCAC            | 319         | OR genomic DNA | pGAL4 attB | attP2            | BT57.1               | (b)                 |
| <i>Ir56d<sup>6</sup></i>      | GAATTCATGAGCAGTCAACATGCTC           | AGATCTATATTTGACGGGACTGACC           | 858         | OR genomic DNA | pGAL4 attB | attP2            | BT76.1               |                     |
| <i>Ir56e<math>\Psi</math></i> |                                     |                                     |             |                |            |                  |                      |                     |
| <i>Ir60a<sup>7</sup></i>      | GAATCTAGTCCCGGACTGATTATC            | GAATCTATTGCTTCTGTCACGTCGG           | 2523        | OR genomic DNA | pGAL4 attB | attP2            | BT83.1               |                     |
| <i>Ir60b</i>                  | AGATCTCATACGATTTCCCGAACAGC          | AGATCTTTTCGAGTTGTCTGCTCGG           | 2368        | OR genomic DNA | pGAL4 attB | attP2            | BT104.1              |                     |
| <i>Ir60c<math>\Psi</math></i> | GAATTCGATTGGATACACAGGTGGC           | GAATCCGGCGACTATCCGAAACGAGC          | 560         | OR genomic DNA | pGAL4 attB | attP2            | BT81.1               | (b)                 |
| <i>Ir60d</i>                  | AGATCTAGATTGGGTACCACAGATGG          | GAATCTTTTAAGGGGACTGCTCACA           | 339         | OR genomic DNA | pGAL4 attB | attP2            | BT63.1               |                     |
| <i>Ir60e</i>                  | AGATCTAAATAATGAGCAGTCCCGAT          | GAATCAAGGCAGCGGAAATGCTT             | 2466        | OR genomic DNA | pGAL4 attB | attP2            | BT72.1               |                     |
| <i>Ir60f<math>\Psi</math></i> |                                     |                                     |             |                |            |                  |                      |                     |
| <i>Ir62a</i>                  | GAATCAAAATCACCGAGTTCAATGCG          | GAATCATTTTCGCTCGTGAACCATG           | 2439        | OR genomic DNA | pGAL4 attB | attP2            | BT118.1              |                     |
| <i>Ir67a</i>                  | AGATCTACAGACGTTTATCAGCAAAG          | GAATTCATATCCTGGCTGAATGGCTG          | 2496        | OR genomic DNA | pGAL4 attB | attP2            | BT73.1               |                     |
| <i>Ir67b</i>                  | AGATCTGGTGTGTCAGCACTATAGC           | GAATCTGAAATGTCTGAAATCTCT            | 515         | OR genomic DNA | pGAL4 attB | attP2            | BT74.1               |                     |
| <i>Ir67c</i>                  | CGGCCGCGGGTGTCTCCATCGTATCCTTC       | CGGCCGCGGATGACGTCTGCCGAAAA          | 2736        | OR genomic DNA | pGAL4 attB | attP2            | BT84.1               |                     |
| <i>Ir68b</i>                  | AGATCTCCGGTTACTCGAAAGATATG          | GAATTCGTTCTAGCAGCACTAACC            | 637         | OR genomic DNA | pGAL4 attB | attP2            | BT48.1               |                     |
| <i>Ir85a</i>                  | AGATCTAAGTCTTCTCAGTTGTCC            | GAATTCGCAATGCCAAGCTTTTGG            | 1369        | OR genomic DNA | pGAL4 attB | attP2            | BT49.1               |                     |
| <i>Ir87a</i>                  | CTCGAGAGTTACCCATATGGACACCG          | AGATCTGCCGCAACGAATGACTGAT           | 2097        | OR genomic DNA | pGAL4 attB | attP2            | BT122.1              |                     |
| <i>Ir94a</i>                  | AGATCTGACACAGATAGATTCCGAC           | AGATCTTTTCTACTTTAGCCAACAAT          | 2294        | OR genomic DNA | pGAL4 attB | attP2            | BT64.1               |                     |
| <i>Ir94b</i>                  | AGATCTAAGATCAAGCGAAGATGACG          | GAATTCATTTTCGTAATTCACGTAGTG         | 482         | OR genomic DNA | pGAL4 attB | attP2            | BT77.1               |                     |
| <i>Ir94c</i>                  | AGATCTTTCTGGCGAGCTCTCTATC           | AGATCTTTTAGTTAGCCTTGGGTTA           | 2303        | OR genomic DNA | pGAL4 attB | attP2            | BT65.1               |                     |
| <i>Ir94d</i>                  | CTCGAGACATTTGTTCCGGTACGTTG          | AGATCTTTTGAATGTGGGAATGTTGGT         | 2420        | OR genomic DNA | pGAL4 attB | attP2            | BT111.1              |                     |
| <i>Ir94e</i>                  | AGATCTTTGGCGACATAAGATGTGGC          | GAATCTTCCGAGGGATTACAAAA             | 322         | OR genomic DNA | pGAL4 attB | attP2            | BT78.1               | (b)                 |
| <i>Ir94f</i>                  | AGATCTGATTGTGGAGCGATCGATTG          | GAATTCCTGTGCAGCAGATGATGATG          | 2493        | OR genomic DNA | pGAL4 attB | attP2            | BT102.1              |                     |
| <i>Ir94g</i>                  | GAATTCGAGCTCACTGTTCACTATGC          | GAATTCCTTATAACTGACTTTCATT           | 388         | OR genomic DNA | pGAL4 attB | attP2            | BT75.1               |                     |
| <i>Ir94h</i>                  | GAATCTTTGTTCAACGCGCAATTACG          | GAATTCGACTTATACCGAAACCGACG          | 2000        | OR genomic DNA | pGAL4 attB | attP2            | BT60.1               | (b)                 |
| <i>Ir100a</i>                 | AGATCTTTCATCGGAGTCTAGCTAG           | GAATTCGTCAGGAGTACTGAACCGT           | 512         | OR genomic DNA | pGAL4 attB | attP2            | BT50.1               | (a)                 |

### Footnotes

1:  $\Psi$  = predicted pseudogene in the reference *D. melanogaster* genome (<http://flybase.org/>); for most of these we therefore did not construct a driver line. For *Ir48a-Gal4* we observed very variable expression in the central and peripheral nervous system. For *Ir60c*, this locus is predicted to be intact in a *w<sup>1118</sup>* strain.

2: Restriction enzyme sites in cloning primers are highlighted in blue.

3: Lines previously published: (a) Croset *et al.*, PLOS Genetics (2010) (Ref. 15); (b) Croset *et al.*, Scientific Reports (2016) (Ref. 28).

4: *Ir52e* is not present in the reference *D. melanogaster* genome, so no driver line was constructed for the locus in this study (see also Koh *et al.*, Neuron (2014) (Ref. 26)).

5: *Ir56a-Gal4* displays expression in several olfactory sensory neuron populations; this is likely to be non-specific as there is no evidence for antennal expression of *Ir56a* (<http://flybase.org/>); as *Ir56a* is located within the intron of another gene (*5-HT1A*), this may reflect overlapping regulatory elements of these genes.

6: *Ir56d-Gal4* was also detected in some larval head chemosensory neurons, but this expression is weak and was not confirmed in the *Ir56d<sup>284</sup>* reporter allele.

7: *Ir60a-Gal4* displays extensive and variable non-neuronal expression, which is likely to be non-specific; as *Ir60a* is located within the intron of another gene (*nord*), this may reflect overlapping regulatory elements of these genes.

## Supplementary Table 2. Gustatory stimuli.

| Tastant                          | CAS        | Calcium imaging Figure 5c |                                                                                            | Notes                                                                                                                                                                                                                                                      |
|----------------------------------|------------|---------------------------|--------------------------------------------------------------------------------------------|------------------------------------------------------------------------------------------------------------------------------------------------------------------------------------------------------------------------------------------------------------|
|                                  |            | Concentration             |                                                                                            |                                                                                                                                                                                                                                                            |
| water                            | -          | -                         | -                                                                                          |                                                                                                                                                                                                                                                            |
| glycerol                         | 56-81-5    | 10% (v/v)                 |                                                                                            |                                                                                                                                                                                                                                                            |
| fructose                         | 57-48-7    | 1 M                       |                                                                                            |                                                                                                                                                                                                                                                            |
| trehalose                        | 6138-23-4  | 1 M                       |                                                                                            |                                                                                                                                                                                                                                                            |
| sucrose                          | 57-50-1    | 1 M                       |                                                                                            |                                                                                                                                                                                                                                                            |
| caffeine                         | 58-08-2    | 15 mg/ml                  |                                                                                            |                                                                                                                                                                                                                                                            |
| denatonium                       | 3734-33-6  | 10 mM                     |                                                                                            |                                                                                                                                                                                                                                                            |
| arginine                         | 74-79-3    | 100 mM                    |                                                                                            |                                                                                                                                                                                                                                                            |
| histidine                        | 71-00-1    | 100 mM                    |                                                                                            |                                                                                                                                                                                                                                                            |
| lysine                           | 56-87-1    | 100 mM                    |                                                                                            |                                                                                                                                                                                                                                                            |
| aspartic acid                    | 56-84-8    | 100 mM                    |                                                                                            |                                                                                                                                                                                                                                                            |
| glutamic acid                    | 56-86-0    | 100 mM                    |                                                                                            |                                                                                                                                                                                                                                                            |
| acetic acid                      | 64-19-7    | 1% (v/v)                  |                                                                                            |                                                                                                                                                                                                                                                            |
| NaCl (high)                      | 7647-14-5  | 1 M                       |                                                                                            |                                                                                                                                                                                                                                                            |
| NaCl (low)                       | 7647-14-5  | 10 mM                     |                                                                                            |                                                                                                                                                                                                                                                            |
| NaHCO <sub>3</sub> (pH 5)        | 144-55-8   | 200 mM                    | 0.5 ml of 200 mM NaHCO <sub>3</sub> (pH 6.5) + 50 µl of 5 M H <sub>2</sub> PO <sub>4</sub> |                                                                                                                                                                                                                                                            |
| CsHCO <sub>3</sub> (pH 7)        | 29703-01-3 | 200 mM                    | pH set with HCl immediately before use                                                     |                                                                                                                                                                                                                                                            |
| NaH <sub>2</sub> PO <sub>4</sub> | 13472-35-0 | 500 mM                    |                                                                                            |                                                                                                                                                                                                                                                            |
| PBS pH 4                         | -          | 100%                      |                                                                                            |                                                                                                                                                                                                                                                            |
| PBS pH 7                         | -          | 100%                      |                                                                                            |                                                                                                                                                                                                                                                            |
| PBS pH 10                        | -          | 100%                      |                                                                                            |                                                                                                                                                                                                                                                            |
| carbonated water                 | -          | -                         | -                                                                                          | Aproz @ (in mg/ml: Ca <sup>2+</sup> 360; Mg <sup>2+</sup> 70; Na <sup>+</sup> 6; K <sup>+</sup> 2.5; HCO <sub>3</sub> <sup>-</sup> 250; NO <sub>3</sub> <sup>-</sup> 1.5; SO <sub>4</sub> <sup>2-</sup> 930; SiO <sub>2</sub> 7) + gaseous CO <sub>2</sub> |
| non-carbonated water             | -          | -                         | -                                                                                          | Aproz @ (in mg/ml: Ca <sup>2+</sup> 360; Mg <sup>2+</sup> 70; Na <sup>+</sup> 6; K <sup>+</sup> 2.5; HCO <sub>3</sub> <sup>-</sup> 250; NO <sub>3</sub> <sup>-</sup> 1.5; SO <sub>4</sub> <sup>2-</sup> 930; SiO <sub>2</sub> 7)                           |
| hexanoic acid                    | 142-62-1   | -                         | -                                                                                          |                                                                                                                                                                                                                                                            |

## Supplementary Table 3. Oligonucleotide sequences used for CRISPR/Cas9-mediated editing of the *Ir56d* locus.

| Oligonucleotide                      | Sequence (5'-3')                                                                | Notes                                                                          |
|--------------------------------------|---------------------------------------------------------------------------------|--------------------------------------------------------------------------------|
| CRISPRsgR                            | AAAAGCACCGACTCGGTGCCACTTTTTCAAGTTGATAACGGACTAGCCTATTTTAACTTGCTATTTCTAGCTCTAAAAC |                                                                                |
| CRISPRsgF- <i>Ir56d</i> <sup>f</sup> | GAATTAATACGACTCACATATAGGTCATCACGGAGCGCATGTGTTTTAGAGCTAGAAATAGC                  | T7 promoter sequence is italicised; <i>Ir56d</i> target sequence is underlined |
| CRISPRsgF- <i>Ir56d</i> <sup>s</sup> | GAATTAATACGACTCACATATAGGTCAGCTATAGCTATCCCATGTTTTAGAGCTAGAAATAGC                 | T7 promoter sequence is italicised; <i>Ir56d</i> target sequence is underlined |
| <i>Ir56d</i> sgRNAs-fwd              | GCGGCCGGGTTTCGATTCGCCGCGATGCAAAATATGGATAATCGTGCTGGTTTTAGAGCTAGAAATAGCAAG        | sgRNA cloning into <i>pCFD5</i>                                                |
| <i>Ir56d</i> sgRNAs-rev              | ATTTTAACCTTGCTATTTCTAGCTCTAAAACGCAAGCCAGATCGTTTTCTCTGCACCAAGCCGGGAATCGAACCC     | sgRNA cloning into <i>pCFD5</i>                                                |
| <i>Ir56d</i> Gal4-HA1-fwd            | GATCCACCTGCGATCTCGCCCCACGCACTGTGCATCCTTGAAGTGC                                  | Homology Arm 1- <i>Gal4</i> ORF fusion                                         |
| <i>Ir56d</i> Gal4-HA1-rev            | GATCCACCTGCGATCCTACGGATCCAGATCCACTAGTCAAGGCCAC                                  | Homology Arm 1- <i>Gal4</i> ORF fusion                                         |
| <i>Ir56d</i> Gal4-HA1-internal-fwd   | ACTGGCAGTCGCCGTACAATATGAAGTACTGTCTTCTATCGAACAAAGC                               | Homology Arm 1- <i>Gal4</i> ORF fusion                                         |
| <i>Ir56d</i> Gal4-HA1-internal-rev   | CGATAGAAGACAGTAGCTTCATATTTGTACGGCGACTGCCAGTGGGTAAC                              | Homology Arm 1- <i>Gal4</i> ORF fusion                                         |
| <i>Ir56d</i> -HA2-fwd                | GATCGCTCTCGTATAGCCAGATCGTTTTCTCAGGCGCTTCATG                                     | Homology Arm 2                                                                 |
| <i>Ir56d</i> -HA2-rev                | GATCGCTCTCGGACGATGCCTTGAACATGATACGTGAAGC                                        | Homology Arm 2                                                                 |

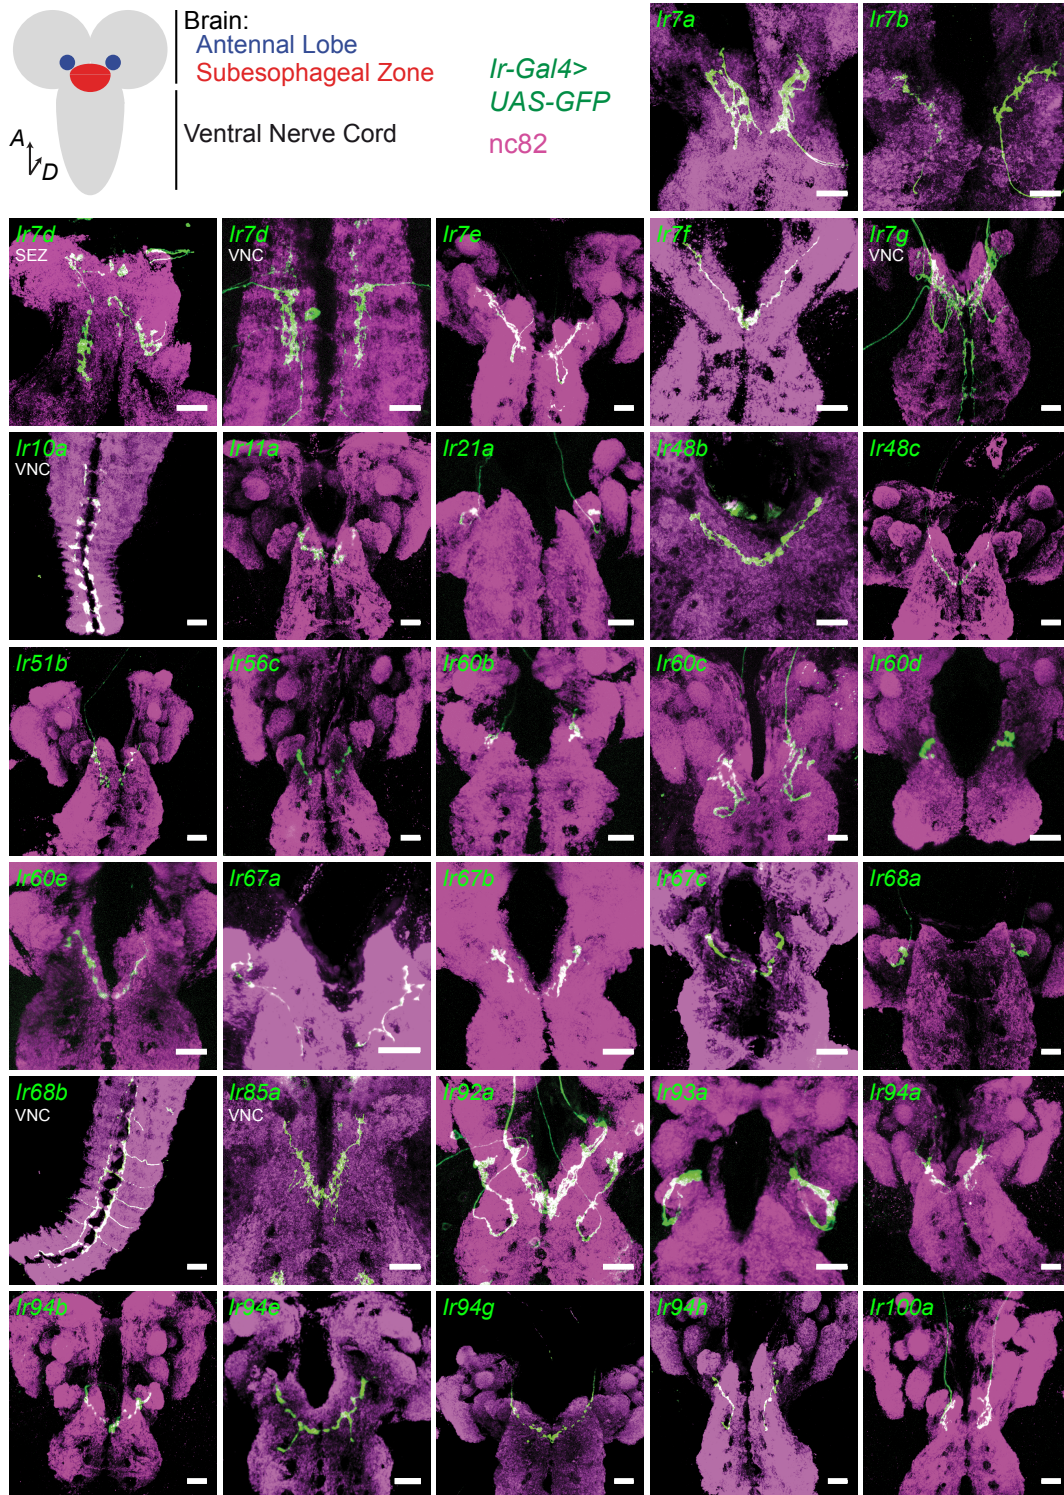

**Supplementary Figure 1. Projections of *Ir-Gal4* expressing sensory neurons in the larval central nervous system.**

Immunofluorescence with anti-GFP (green) and *nc82* (magenta) on whole-mount brains of third instar larvae, revealing the projection patterns of *Ir-Gal4*-expressing neuron populations in the brain and ventral nerve cord (as schematised in the cartoon at the top left). Images for *Ir7a*, *Ir7b*, *Ir7g*, *Ir94e* and *Ir94h* drivers have been adapted from Ref. 28. Genotypes are of the form: *w*; *UAS-mCD8:GFP*; *IrX-Gal4*. SEZ: Subesophageal Zone; VNC: Ventral Nerve Cord. Scale bars: 20  $\mu$ m.

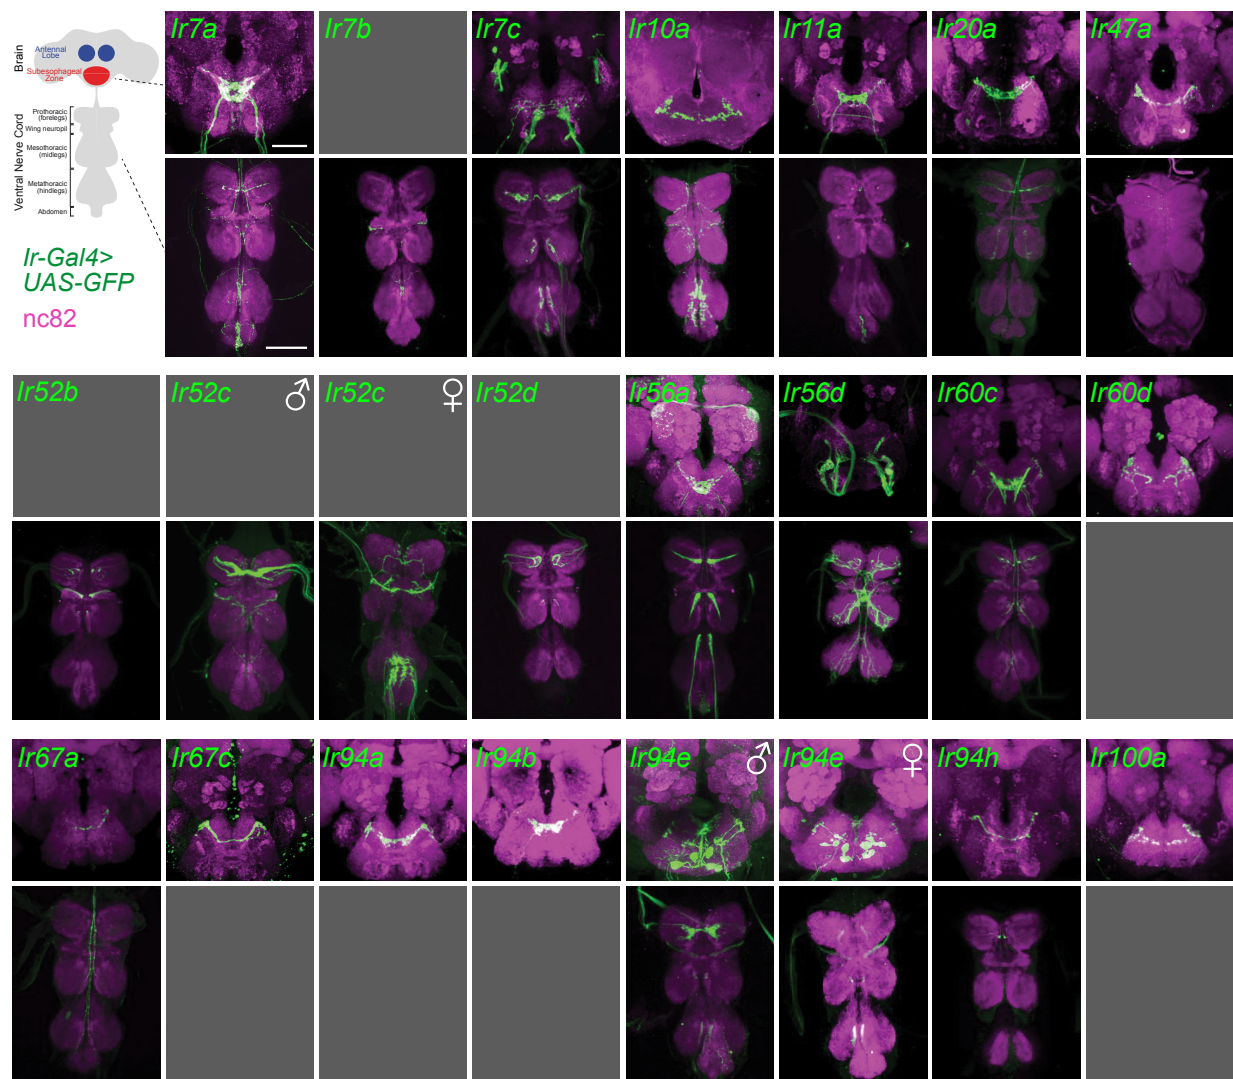

**Supplementary Figure 2. Projections of *Ir-Gal4* expressing sensory neurons in the adult central nervous system.**

Immunofluorescence with anti-GFP (green) and nc82 (magenta) on whole-mount adult brains and ventral nerve cords (schematised top left), revealing the projection patterns of *Ir-Gal4*-expressing neuron populations. Grey panels indicate no expression was detected for that Gal4 driver. Genotypes are of the form: *w;UAS-mCD8:GFP;IrX-Gal4*. Scale bars: 50  $\mu\text{m}$  (brain), 100  $\mu\text{m}$  (ventral nerve cord).

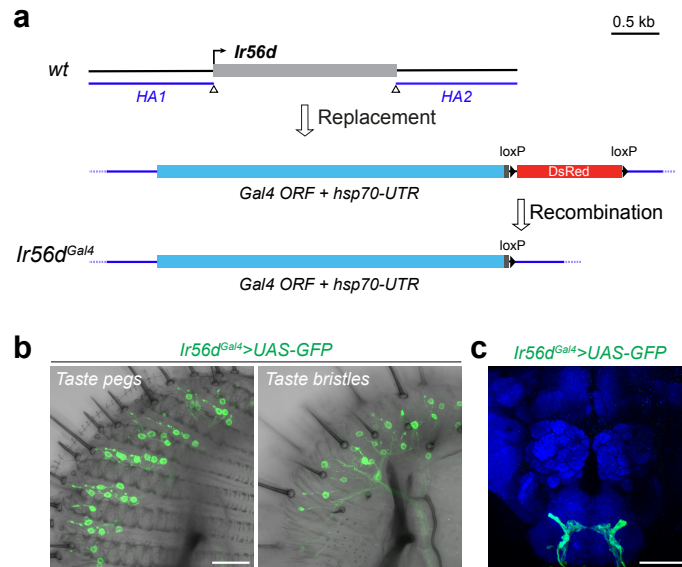

**Supplementary Figure 3. Construction and characterisation of an *Ir56d*<sup>Gal4</sup> allele.**

(a) Schematic representing the generation of the *Ir56d*<sup>Gal4</sup> allele. The entire *Ir56d* exon was substituted with the *Gal4* sequence by CRISPR/Cas9-mediated homologous recombination (HA: Homology Arm; open arrowheads indicate the positions of the sgRNA target sequences). Subsequently, the DsRed marker used for screening of positive recombination events was removed with Cre recombinase.

(b) Immunofluorescence with anti-GFP (green), overlaid on a bright-field image, of a whole mount proboscis of a *w;Ir56d*<sup>Gal4</sup>;UAS-*mCD8*:GFP animal. Scale bar: 25  $\mu$ m.

(c) Immunofluorescence with anti-GFP (green) and nc82 (blue) on a whole mount brain of a *w;Ir56d*<sup>Gal4</sup>;UAS-*mCD8*:GFP animal. Scale bar: 50  $\mu$ m.

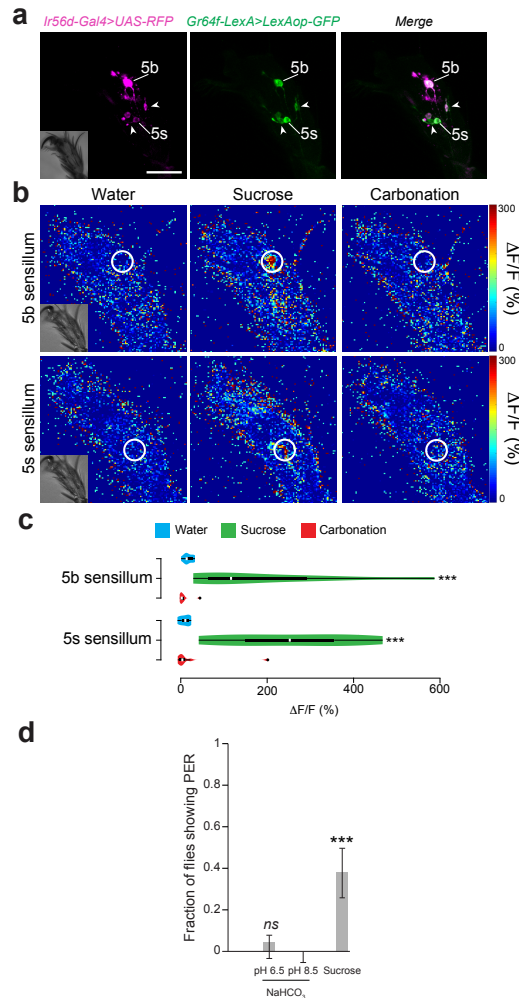

#### Supplementary Figure 4. IR56d neurons in the legs do not respond to carbonation.

(a) Raw fluorescence images of a whole-mount leg of a *w;LexAop-mCD8:GFP-2A-mCD8:GFP/UAS-mCD8:RFP;Gr64f-LexA/Ir56d-Gal4* animal. *Ir56d-Gal4* is expressed in a subset of *Gr64f-LexA* neurons; arrowheads indicate neurons that express *Gr64f-LexA* but not *Ir56d-Gal4*. The inset in the left-hand panel shows a bright-field view of the imaged tissue. Scale bar: 25  $\mu$ m.

(b) Colour-coded images of  $\Delta F/F$  (reflecting the maximal GCaMP3 fluorescence intensity changes; scale bars on the far right) of the responses of IR56d neurons in two different tarsal sensilla upon application of distilled water, 100 mM sucrose and a carbonated solution to the legs. White circles highlight the ROIs used for quantification of responses. The insets in the left-hand panels show bright-field views of the imaged tissue. Genotype: *w;UAS-GCaMP3;Ir56d-Gal4*.

(c) Quantification of changes in  $\Delta F/F$  in the ROIs shown in (b) upon application of the indicated taste stimuli to the legs of the flies ( $n=8$  for both “5b” and “5s” tarsal neurons). For the statistical analysis the response data for each stimulus are compared; *ns*: non-significant,  $**P<0.01$ ,  $***P<0.001$  (Wilcoxon rank sum test).

(d) Fraction of *w<sup>1118</sup>* flies ( $n=68$ ) showing the proboscis extension reflex (PER) to the tastants indicated when applied to the legs (100 mM NaHCO<sub>3</sub> at pH 6.5 or pH 8.5, 100 mM sucrose). Error bars represent the  $\pm 95\%$  binomial confidence intervals;  $*P<0.05$ ,  $***P<0.001$  (Fisher exact test).

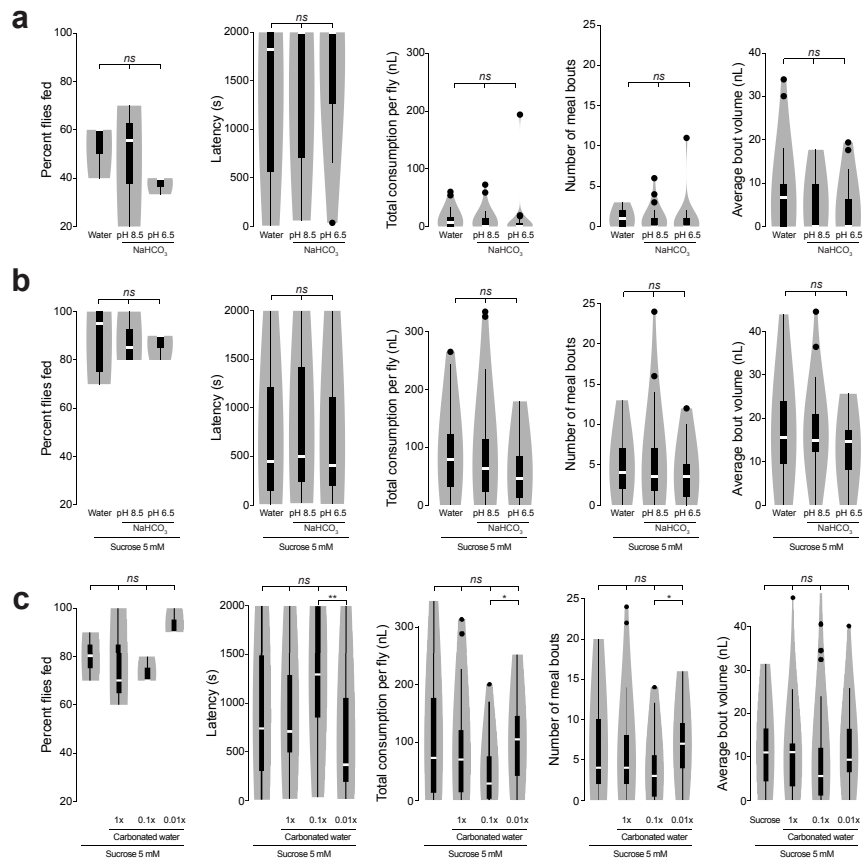

### Supplementary Figure 5. Analysis of the influence of carbonation on feeding by Expresso.

(a) Feeding success, latency to first bout, total consumption per fly, number of meal bouts and average bout volume for male  $w^{1118}$  flies ( $n=30$  per tastant) feeding from water, 100 mM  $\text{NaHCO}_3$  pH 8.5 or 100 mM  $\text{NaHCO}_3$  pH 6.5 solutions. Pairwise comparisons using Tukey and Kramer (Nemenyi) test with Tukey-Dist approximation for independent samples; *ns*: non-significant.

(b) Feeding success, latency to first bout, total consumption per fly, number of meal bouts and average bout volume for male  $w^{1118}$  flies ( $n=30$  per tastant) feeding from solutions containing 5 mM sucrose, 5 mM sucrose + 100 mM  $\text{NaHCO}_3$  pH 8.5 or 5 mM sucrose + 100 mM  $\text{NaHCO}_3$  pH 6.5 solutions. Pairwise comparisons using Tukey and Kramer (Nemenyi) test with Tukey-Dist approximation for independent samples.

(c) Feeding success, latency to first bout, total consumption per fly, number of meal bouts and average bout volume for male  $w^{1118}$  flies ( $n=30$  per tastant) feeding from solutions containing 5 mM sucrose or 5 mM sucrose + the indicated dilutions (v/v) of commercial carbonated water (Supplementary Table 2). Pairwise comparisons using Tukey and Kramer (Nemenyi) test with Tukey-Dist approximation for independent samples: \* $P < 0.05$ , \*\* $P < 0.01$ .



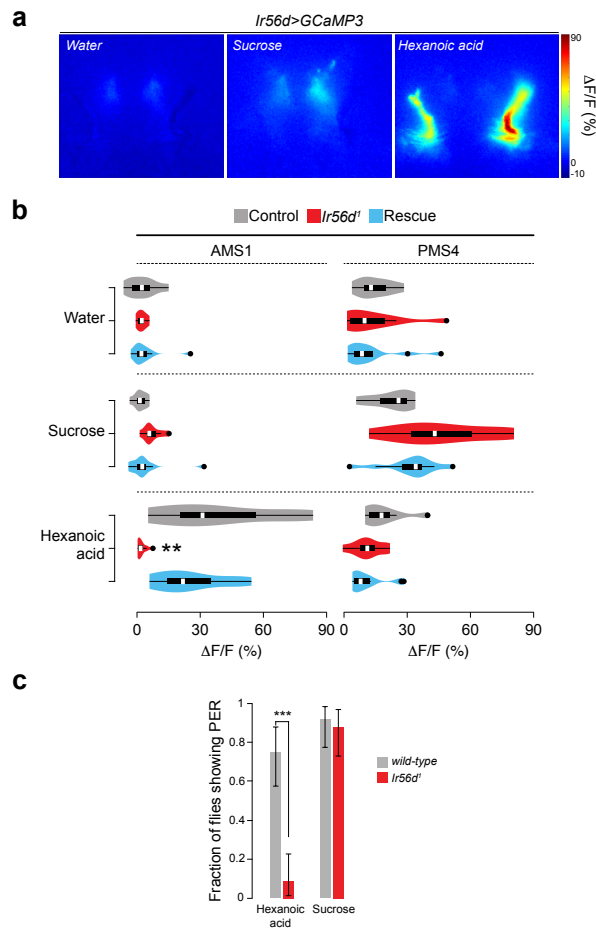

**Supplementary Figure 6. IR56d is required for physiological and behavioural responses to hexanoic acid.**

(a) Colour-coded images (reflecting the maximal GCaMP3 fluorescence intensity changes) in *w;Bl/+;UAS-GCaMP3,Ir56d-Gal4/+* animals stimulated with distilled water, 1 M sucrose and 1% (v/v) hexanoic acid.

(b) Quantification of changes in GCaMP3 fluorescence ( $\Delta F/F$ ) upon stimulation with the indicated chemicals (as in (a)) to the proboscis of the flies. Genotypes: Control: *w;Bl/+;UAS-GCaMP3,Ir56d-Gal4/+* (n=7); Mutant: *w;Ir56d<sup>1</sup>/Ir56d<sup>1</sup>;UAS-GCaMP3,Ir56d-Gal4/+* (n=8); Rescue: *w;Ir56d<sup>1</sup>,UAS-Ir56d/Ir56d<sup>1</sup>;UAS-GCaMP3,Ir56d-Gal4/+* (n=11). For the statistical analysis the response data for each stimulus are compared with water; only significant differences are shown: \*\*P<0.01 (Wilcoxon rank sum test with Bonferroni correction for multiple comparisons).

(c) Fraction of *w<sup>1118</sup>* (n=36) or *Ir56d<sup>1</sup>* mutant (n=33) flies showing proboscis extension reflex (PER) to 1% (v/v) hexanoic acid and 100 mM sucrose. Error bars represent the  $\pm 95\%$  binomial confidence intervals; \*\*\*P<0.001 (Fisher exact test).

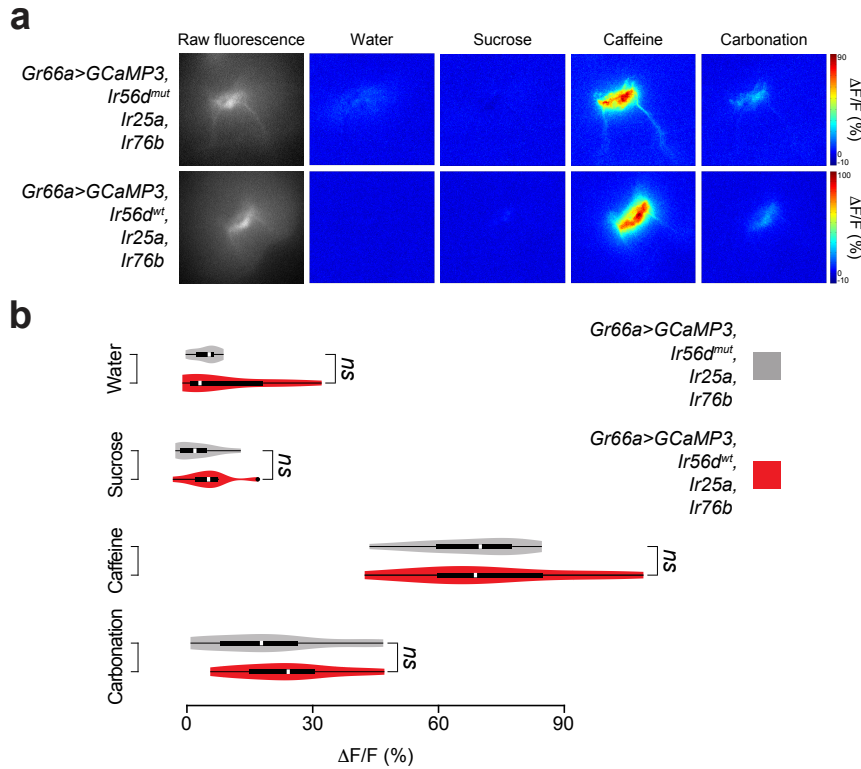

**Supplementary Figure 7. Expression of IR56d, IR25a and IR76b in bitter-sensing neurons is not sufficient to confer carbonation sensitivity.**

(a) Colour-coded images (reflecting the maximal GCaMP3 fluorescence intensity changes; scale bar on the far-right) in *w;UAS-Ir25a,Gr66a-Gal4/UAS-Ir56d<sup>mut</sup>,UAS-Ir76b;UAS-GCaMP3/+* and *w;UAS-Ir25a,Gr66a-Gal4/UAS-Ir56d<sup>wt</sup>,UAS-Ir76b;UAS-GCaMP3/+* animals stimulated with distilled water, 1 M sucrose, 100 mM caffeine and a carbonated solution. The *UAS-Ir56d<sup>mut</sup>* transgene contains a frameshift mutation and is predicted to encode a truncated, non-functional receptor; *UAS-Ir56d<sup>wt</sup>* is the same transgene used in the rescue experiments (Fig. 6c).

(b) Quantification of changes in GCaMP3 fluorescence ( $\Delta F/F$ ) upon stimulation with the indicated chemicals (as in (a)) to the proboscis of flies of the genotypes: *w;UAS-Ir25a,Gr66a-Gal4/UAS-Ir56d<sup>mut</sup>,UAS-Ir76b;UAS-GCaMP3/+* (n=10) and *w;UAS-Ir25a,Gr66a-Gal4/UAS-Ir56d<sup>wt</sup>,UAS-Ir76b;UAS-GCaMP3/+* (n=9). For the statistical analysis, response data for each pair are compared; *ns*: non-significant (Wilcoxon rank sum test with Bonferroni correction for multiple comparisons).

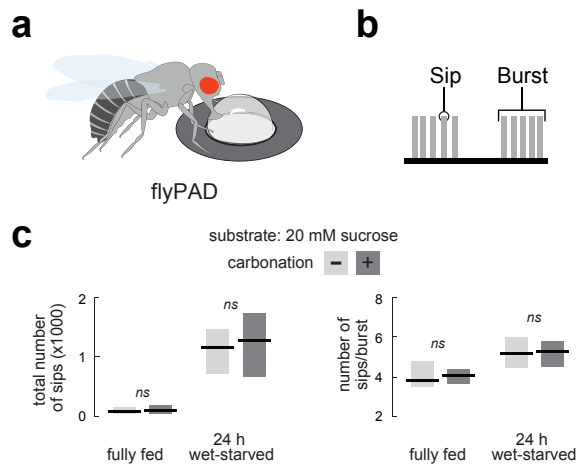

**Supplementary Figure 8. Analysis of the influence of carbonation on feeding by flyPAD.**

(a) Schematic of the flyPAD assay.

(b) Schematic of the microstructure of feeding behaviour that can be detected with flyPAD. Sips (representing a contact of the proboscis with food) are grouped into feeding bursts.

(c) Total number of sips and number of sips per burst of  $w^{1118}$  flies ( $n=26-60$ ), from 20 mM sucrose solution without (-) or with (+) commercial carbonated water. Boxes represent median with upper/lower quartiles; pairs were compared using Wilcoxon rank-sum test; *ns*: non-significant.
